# Supplementary material for: Late Bronze Age climate change and the destruction of the Mycenaean Palace of Nestor at Pylos
Source: PubMed Central journal article supplement (PMC5744937; doi:10.1371/journal.pone.0189447), 2017-12-27

FIG S2

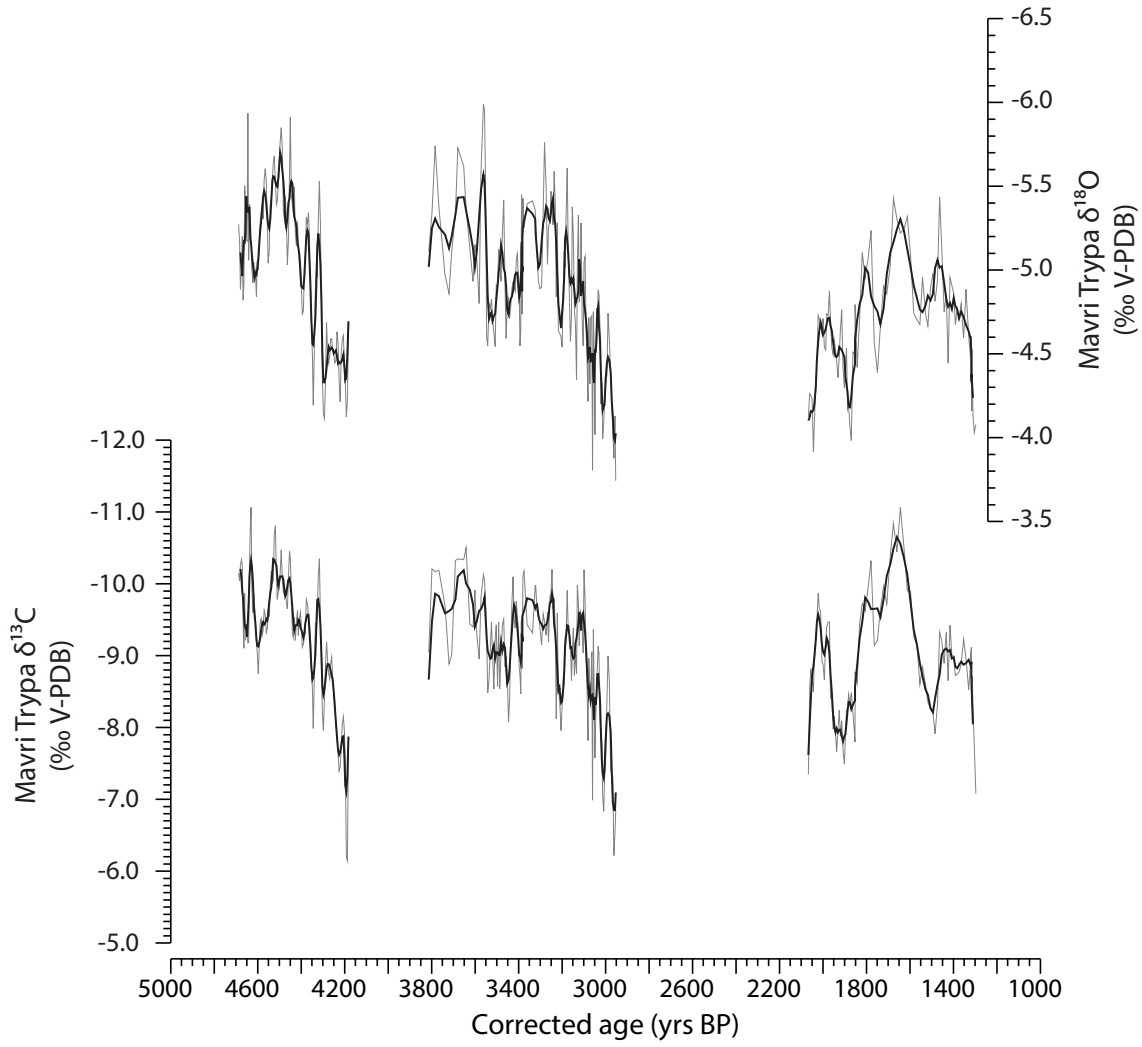

Supplement: pone.0189447.s002.pdf [file pone.0189447.s002.pdf]
